# Supplementary material
Source: PubMed Central journal article supplement (PMC10315517)
Supplement: sj-pdf-1-jah-10.1177_08982643231185689.pdf [file sj-pdf-1-jah-10.1177_08982643231185689.pdf]

## Supplemental Materials

### *Data sources for area-level measures*

For our area-level analysis, we drew from a number of publicly available data sources to characterize aspects of potential COVID vulnerability. We used the following data sources:

- The *American Community Survey (ACS)*, administered by the Census Bureau annually to track population and housing data in the United States. We used the 2016–2020 ACS five-year estimates for our analysis.
- The Agency for Healthcare Research and Quality’s database of *Social Determinants of Health (SDOH)* beta files, which aggregates data from existing sources related to social context, economic context, education, and physical infrastructure. We used the SDOH file from 2018 for our analysis.
- The 2021 *County Health Rankings*, which provides county-level data on health outcomes and health factors. These measures are weighted and aggregated to provide a ranking for each county.
- The *COVID-19 Pandemic Vulnerability Index (PVI) Model 11.2*, which aggregates 18 components of pandemic vulnerability related to infection spread, population concentration, intervention measures, and the health environment of each county to estimate its vulnerability to the COVID-19 pandemic. The PVI is updated daily.
- *COVID Act Now*, which tracks COVID-19 risk level, case numbers, and vaccination rates at the county level. This data is updated daily.
- The National Conference of State Legislatures, which produces yearly statistics of state-level political party representation in state legislatures and in the governor’s office.

Supplemental Tables

**Table S.1. Association between area-level Pandemic Vulnerability Index and self-reported health, work, and financial experiences during the COVID-19 pandemic**

| Pandemic Vulnerability Index (PVI) |          |     |         |     |         |     |                    |     |          |     |          |     |         |     |         |     |         |     |
|------------------------------------|----------|-----|---------|-----|---------|-----|--------------------|-----|----------|-----|----------|-----|---------|-----|---------|-----|---------|-----|
|                                    | Finance  |     |         |     |         |     | Health care delays |     |          |     |          |     | Work    |     |         |     |         |     |
|                                    | Model 0  |     | Model 1 |     | Model 2 |     | Model 0            |     | Model 1  |     | Model 2  |     | Model 0 |     | Model 1 |     | Model 2 |     |
| PVI                                | 1.05     |     | 1.03    |     | 1.04    |     | 1.0                |     | 1.0      |     | 0.9      |     | 1.0     |     | 1.0     |     | 1.0     |     |
| Disability                         | 1.94     | *** | 1.89    | *** | 1.90    | *** | 1.4                | *** | 1.6      | *** | 1.6      | *** | 0.4     | *** | 0.7     | *** | 0.7     | *** |
| Race                               |          |     |         |     |         |     |                    |     |          |     |          |     |         |     |         |     |         |     |
| Black                              | 1.99     | *** | 1.48    | *** | 1.48    | *** | 1.0                |     | 0.8      | *** | 0.8      | *** | 1.3     | *** | 0.9     |     | 0.9     |     |
| Other                              | 2.11     | *** | 1.60    | *** | 1.61    | *** | 1.1                |     | 0.9      |     | 0.9      |     | 1.5     | *** | 0.9     |     | 0.9     |     |
| Hispanic                           | 2.17     | *** | 1.64    | *** | 1.63    | *** | 0.9                | **  | 0.8      | *** | 0.8      | *** | 1.4     | *** | 1.1     | *   | 1.2     | *   |
| PVI* Disability                    | N/A      |     | N/A     |     | 0.93    |     | N/A                |     | N/A      |     | 1.0      |     | N/A     |     | N/A     |     | 0.9     |     |
| PVI*Black                          | N/A      |     | N/A     |     | 1.04    |     | N/A                |     | N/A      |     | 1.0      |     | N/A     |     | N/A     |     | 1.0     |     |
| PVI*Other                          | N/A      |     | N/A     |     | 1.01    |     | N/A                |     | N/A      |     | 1.0      |     | N/A     |     | N/A     |     | 1.0     |     |
| PVI*Hispanic                       | N/A      |     | N/A     |     | 1.09    |     | N/A                |     | N/A      |     | 1.1      |     | N/A     |     | N/A     |     | 0.9     |     |
| Individual Covariates              |          |     |         |     |         |     |                    |     |          |     |          |     |         |     |         |     |         |     |
| Interaction terms                  |          |     | Yes     |     | Yes     |     |                    |     | Yes      |     | Yes      |     |         |     | Yes     |     | Yes     |     |
| N                                  | 8,503    |     | 8,486   |     | 8,486   |     | 8,505              |     | 8,487    |     | 8,487    |     | 8,533   |     | 8,507   |     | 8,507   |     |
| Number of Counties                 | 781      |     | 778     |     | 778     |     | 779                |     | 776      |     | 776      |     | 781     |     | 777     |     | 777     |     |
| AIC                                | 10,082.7 |     | 9,719.9 |     | 9,724.8 |     | 10,441.3           |     | 10,066.7 |     | 10,073.5 |     | 9765.9  |     | 8,352.6 |     | 8,356.5 |     |
| BIC                                | 10,132.0 |     | 9,889.0 |     | 9,922.1 |     | 10,490.7           |     | 10,228.8 |     | 10,263.8 |     | 9815.3  |     | 8,514.7 |     | 8,546.8 |     |

Notes: \* Indicates  $p < 0.10$ , \*\* indicates  $p < 0.05$ , and \*\*\* indicates  $p < 0.01$ . N/A = not applicable.

**Table S.2. Association between area-level COVID case counts and self-reported health, work, and financial experiences during the COVID-19 pandemic**

| Cases per 100,000 (C100) |          |          |          |                    |          |          |         |         |         |  |  |  |
|--------------------------|----------|----------|----------|--------------------|----------|----------|---------|---------|---------|--|--|--|
|                          | Finance  |          |          | Health care delays |          |          | Work    |         |         |  |  |  |
|                          | Model 0  | Model 1  | Model 2  | Model 0            | Model 1  | Model 2  | Model 0 | Model 1 | Model 2 |  |  |  |
| C100                     | 1.06 *   | 1.05     | 1.05     | 0.9 **             | 1.0 *    | 0.9 **   | 1.0     | 1.0     | 1.0     |  |  |  |
| Disability               | 1.94 *** | 1.88 *** | 1.89 *** | 1.4 ***            | 1.6 ***  | 1.6 ***  | 0.4 *** | 0.7 *** | 0.7 *** |  |  |  |
| Race                     |          |          |          |                    |          |          |         |         |         |  |  |  |
| Black                    | 2.04 *** | 1.50 *** | 1.50 *** | 0.9                | 0.8 ***  | 0.8 ***  | 1.3 *** | 0.9     | 0.9     |  |  |  |
| Other                    | 2.14 *** | 1.61 *** | 1.63 *** | 1.1                | 0.9      | 0.9      | 1.5 *** | 0.8     | 0.8     |  |  |  |
| Hispanic                 | 2.18 *** | 1.64 *** | 1.63 *** | 0.9 **             | 0.8 ***  | 0.8 ***  | 1.4 *** | 1.1     | 1.2 *   |  |  |  |
| C100* Disability         | N/A      | N/A      | 0.92     | N/A                | N/A      | 1.1 *    | N/A     | N/A     | 1.0     |  |  |  |
| C100*Black               | N/A      | N/A      | 1.09     | N/A                | N/A      | 1.0      | N/A     | N/A     | 1.0     |  |  |  |
| C100*Other               | N/A      | N/A      | 0.95     | N/A                | N/A      | 0.9      | N/A     | N/A     | 1.3 **  |  |  |  |
| C100* Hispanic           | N/A      | N/A      | 1.08     | N/A                | N/A      | 1.1      | N/A     | N/A     | 1.0     |  |  |  |
| Individual covariates    |          | Yes      | Yes      |                    | Yes      | Yes      |         | Yes     | Yes     |  |  |  |
| Interaction terms        |          |          | Yes      |                    |          | Yes      |         |         | Yes     |  |  |  |
| N                        | 8,497    | 8,480    | 8,480    | 8,499              | 8,481    | 8,481    | 8,527   | 8,501   | 8,501   |  |  |  |
| Number of counties       | 777      | 774      | 774      | 775                | 772      | 772      | 777     | 773     | 773     |  |  |  |
| AIC                      | 10,074.1 | 9,710.4  | 9,713.3  | 10,433.1           | 10,062.8 | 10,063.6 | 9,760.1 | 8,348.8 | 8,350.1 |  |  |  |

|     |          |         |         |          |          |          |         |         |         |
|-----|----------|---------|---------|----------|----------|----------|---------|---------|---------|
| BIC | 10,123.4 | 9,879.5 | 9,910.6 | 10,482.5 | 10,231.9 | 10,253.8 | 9,809.5 | 8,510.9 | 8,540.4 |
|-----|----------|---------|---------|----------|----------|----------|---------|---------|---------|

Notes: \* Indicates  $p < 0.10$ , \*\* indicates  $p < 0.05$ , and \*\*\* indicates  $p < 0.01$ . N/A = not applicable.

**Table S.3. Association between area-level Social Vulnerability Index and self-reported health, work, and financial experiences during the COVID-19 pandemic**

| Social Vulnerability Index (SVI) |          |          |          |                    |         |         |         |         |         |  |
|----------------------------------|----------|----------|----------|--------------------|---------|---------|---------|---------|---------|--|
|                                  | Finance  |          |          | Health care delays |         |         | Work    |         |         |  |
|                                  | Model 0  | Model 1  | Model 2  | Model 0            | Model 1 | Model 2 | Model 0 | Model 1 | Model 2 |  |
| SVI                              | 1.05     | 1.04     | 1.06     | 1.0                | 1.0     | 0.9     | 0.9 *   | 1.0     | 1.0     |  |
| Disability                       | 1.94 *** | 1.88 *** | 1.89 *** | 1.4 ***            | 1.6 *** | 1.6 *** | 0.4 *** | 0.7 *** | 0.7 *** |  |
| Race                             |          |          |          |                    |         |         |         |         |         |  |
| Black                            | 2.01 *** | 1.48 *** | 1.48 *** | 1.0                | 0.8 *** | 0.8 *** | 1.3 *** | 0.9     | 0.9     |  |
| Other                            | 2.12 *** | 1.59 *** | 1.59 *** | 1.1                | 0.9     | 0.9     | 1.5 *** | 0.9     | 0.9     |  |
| Hispanic                         | 2.16 *** | 1.63 *** | 1.62 *** | 0.9 *              | 0.8 *** | 0.8 *** | 1.4 *** | 1.2 *   | 1.2 **  |  |
| SVI* Disability                  | N/A      | N/A      | 0.94     | N/A                | N/A     | 1.1     | N/A     | N/A     | 0.9     |  |
| SVI*Black                        | N/A      | N/A      | 1.00     | N/A                | N/A     | 1.0     | N/A     | N/A     | 1.0     |  |
| SVI*Other                        | N/A      | N/A      | 1.01     | N/A                | N/A     | 1.0     | N/A     | N/A     | 1.1     |  |
| SVI*Hispanic                     | N/A      | N/A      | 1.01     | N/A                | N/A     | 1.1     | N/A     | N/A     | 0.9     |  |
| Individual covariates            |          | Yes      | Yes      |                    | Yes     | Yes     |         | Yes     | Yes     |  |
| Interaction terms                |          |          | Yes      |                    |         | Yes     |         |         | Yes     |  |
| N                                | 8,503    | 8,486    | 8,486    | 8,505              | 8,487   | 8,487   | 8,533   | 8,507   | 8,507   |  |
| Number of counties               | 781      | 778      | 778      | 779                | 776     | 776     | 781     | 777     | 777     |  |

|     |          |         |         |          |          |          |         |         |         |
|-----|----------|---------|---------|----------|----------|----------|---------|---------|---------|
| AIC | 10,082.5 | 9,719.2 | 9,725.9 | 10,441.4 | 10,068.0 | 10,074.3 | 9,762.9 | 8,352.0 | 8,354.7 |
| BIC | 10,131.8 | 9,888.3 | 9,923.2 | 10,490.7 | 10,230.0 | 10,271.6 | 9,812.3 | 8,514.1 | 8,545.1 |

Notes: \* Indicates  $p < 0.10$ , \*\* indicates  $p < 0.05$ , and \*\*\* indicates  $p < 0.01$ . N/A = not applicable.

**Table S.4. Association between area-level residential racial segregation and self-reported health, work, and financial experiences during the COVID-19 pandemic**

| Non-White–White residential racial segregation (NWS) |          |     |         |     |         |     |                    |     |          |     |          |     |         |     |         |     |         |     |
|------------------------------------------------------|----------|-----|---------|-----|---------|-----|--------------------|-----|----------|-----|----------|-----|---------|-----|---------|-----|---------|-----|
|                                                      | Finance  |     |         |     |         |     | Health care delays |     |          |     |          |     | Work    |     |         |     |         |     |
|                                                      | Model 0  |     | Model 1 |     | Model 2 |     | Model 0            |     | Model 1  |     | Model 2  |     | Model 0 |     | Model 1 |     | Model 2 |     |
| NWS                                                  | 0.99     |     | 0.98    |     | 0.94    |     | 1.0                |     | 1.0      |     | 1.1      |     | 1.1     | **  | 1.1     | **  | 1.1     |     |
| Disability                                           | 1.95     | *** | 1.89    | *** | 1.89    | *** | 1.4                | *** | 1.6      | *** | 1.6      | *** | 0.4     | *** | 0.7     | *** | 0.7     | *** |
| Race                                                 |          |     |         |     |         |     |                    |     |          |     |          |     |         |     |         |     |         |     |
| Black                                                | 2.05     | *** | 1.51    | *** | 1.51    | *** | 0.9                |     | 0.8      | *** | 0.7      | *** | 1.2     | *** | 0.9     |     | 0.9     | *   |
| Other                                                | 2.12     | *** | 1.60    | *** | 1.61    | *** | 1.1                |     | 0.9      |     | 0.9      |     | 1.5     | *** | 0.8     |     | 0.9     |     |
| Hispanic                                             | 2.20     | *** | 1.65    | *** | 1.70    | *** | 0.9                | **  | 0.8      | *** | 0.8      | *** | 1.4     | *** | 1.1     |     | 1.1     |     |
| NWS* Disability                                      | N/A      |     | N/A     |     | 0.96    |     | N/A                |     | N/A      |     | 0.9      |     | N/A     |     | N/A     |     | 1.0     |     |
| NWS*Black                                            | N/A      |     | N/A     |     | 1.09    |     | N/A                |     | N/A      |     | 1.0      |     | N/A     |     | N/A     |     | 1.1     |     |
| NWS*Other                                            | N/A      |     | N/A     |     | 1.22    |     | N/A                |     | N/A      |     | 0.8      |     | N/A     |     | N/A     |     | 1.2     |     |
| NWS*Hispanic                                         | N/A      |     | N/A     |     | 1.16    | **  | N/A                |     | N/A      |     | 1.0      |     | N/A     |     | N/A     |     | 1.0     |     |
| Individual covariates                                |          |     | Yes     |     | Yes     |     |                    |     | Yes      |     | Yes      |     |         |     | Yes     |     | Yes     |     |
| Interaction terms                                    |          |     |         |     | Yes     |     |                    |     |          |     | Yes      |     |         |     |         |     | Yes     |     |
| N                                                    | 8,490    |     | 8,473   |     | 8,473   |     | 8,492              |     | 8,474    |     | 8,474    |     | 8,520   |     | 8,494   |     | 8,494   |     |
| Number of counties                                   | 772      |     | 769     |     | 769     |     | 770                |     | 767      |     | 767      |     | 772     |     | 768     |     | 768     |     |
| AIC                                                  | 10,075.0 |     | 9,711.9 |     | 9,713.0 |     | 10,425.6           |     | 10,050.6 |     | 10,054.9 |     | 9,752.4 |     | 8,340.9 |     | 8,346.2 |     |
| BIC                                                  | 10,124.4 |     | 9,880.9 |     | 9,910.3 |     | 10,474.9           |     | 10,212.6 |     | 10,245.1 |     | 9,801.7 |     | 8,503.0 |     | 8,536.5 |     |

Notes: \* Indicates  $p < 0.10$ , \*\* indicates  $p < 0.05$ , and \*\*\* indicates  $p < 0.01$ . N/A = not applicable.

**Table S.5. Association between area-level hospital capacity and self-reported health, work, and financial experiences during the COVID-19 pandemic**

| Hospital capacity, available beds (HB) |          |     |         |     |         |     |                    |     |          |     |          |     |         |     |         |     |         |     |
|----------------------------------------|----------|-----|---------|-----|---------|-----|--------------------|-----|----------|-----|----------|-----|---------|-----|---------|-----|---------|-----|
|                                        | Finance  |     |         |     |         |     | Health care delays |     |          |     |          |     | Work    |     |         |     |         |     |
|                                        | Model 0  |     | Model 1 |     | Model 2 |     | Model 0            |     | Model 1  |     | Model 2  |     | Model 0 |     | Model 1 |     | Model 2 |     |
| HB                                     | 1.01     |     | 1.02    |     | 0.99    |     | 1.0                |     | 1.0      |     | 1.0      |     | 1.0     |     | 1.0     |     | 1.0     |     |
| Disability                             | 1.95     | *** | 1.89    | *** | 1.89    | *** | 1.4                | *** | 1.6      | *** | 1.6      | *** | 0.4     | *** | 0.7     | *** | 0.7     | *** |
| Race                                   |          |     |         |     |         |     |                    |     |          |     |          |     |         |     |         |     |         |     |
| Black                                  | 2.05     | *** | 1.51    | *** | 1.50    | *** | 0.9                |     | 0.8      | *** | 0.8      | *** | 1.3     | *** | 0.9     |     | 0.9     |     |
| Other                                  | 2.14     | *** | 1.61    | *** | 1.65    | *** | 1.1                |     | 0.9      |     | 0.9      |     | 1.5     | *** | 0.9     |     | 0.9     |     |
| Hispanic                               | 2.21     | *** | 1.66    | *** | 1.65    | *** | 0.8                | **  | 0.8      | *** | 0.8      | *** | 1.4     | *** | 1.1     |     | 1.1     |     |
| HB*Disability                          | N/A      |     | N/A     |     | 1.1     | **  | N/A                |     | N/A      |     | 1.0      |     | N/A     |     | N/A     |     | 1.2     | *** |
| HB*Black                               | N/A      |     | N/A     |     | 0.9     |     | N/A                |     | N/A      |     | 1.0      |     | N/A     |     | N/A     |     | 0.9     | *   |
| HB*Other                               | N/A      |     | N/A     |     | 0.8     |     | N/A                |     | N/A      |     | 1.0      |     | N/A     |     | N/A     |     | 0.8     |     |
| HB*Hispanic                            | N/A      |     | N/A     |     | 1.0     |     | N/A                |     | N/A      |     | 0.8      | **  | N/A     |     | N/A     |     | 1.1     |     |
| Individual covariates                  |          |     | Yes     |     | Yes     |     |                    |     | Yes      |     | Yes      |     |         |     | Yes     |     | Yes     |     |
| Interaction terms                      |          |     |         |     | Yes     |     |                    |     |          |     | Yes      |     |         |     |         |     | Yes     |     |
| N                                      | 8,503    |     | 8,486   |     | 8,486   |     | 8,505              |     | 8,487    |     | 8,487    |     | 8,533   |     | 8,507   |     | 8,507   |     |
| Number of counties                     | 781      |     | 778     |     | 778     |     | 779                |     | 776      |     | 776      |     | 781     |     | 777     |     | 777     |     |
| AIC                                    | 10,084.6 |     | 9,720.5 |     | 9,721.1 |     | 10,442.7           |     | 10,068.5 |     | 10,071.5 |     | 9,766.7 |     | 8,352.9 |     | 8,346.4 |     |
| BIC                                    | 10,133.9 |     | 9,889.6 |     | 9,918.4 |     | 10,492.1           |     | 10,230.6 |     | 10,261.8 |     | 9,816.0 |     | 8,515.0 |     | 8,536.7 |     |

Notes: \* Indicates  $p < 0.10$ , \*\* indicates  $p < 0.05$ , and \*\*\* indicates  $p < 0.01$ . N/A = not applicable.

**Table S.6. Association between area-level county unemployment rate and self-reported health, work, and financial experiences during the COVID-19 pandemic**

| County unemployment rate (UR) |          |          |          |                    |          |          |         |         |         |  |  |  |
|-------------------------------|----------|----------|----------|--------------------|----------|----------|---------|---------|---------|--|--|--|
|                               | Finance  |          |          | Health care delays |          |          | Work    |         |         |  |  |  |
|                               | Model 0  | Model 1  | Model 2  | Model 0            | Model 1  | Model 2  | Model 0 | Model 1 | Model 2 |  |  |  |
| UR                            | 1.05     | 1.01     | 1.03     | 1.0                | 1.0      | 1.0      | 1.0     | 1.0     | 1.0     |  |  |  |
| Disability                    | 1.94 *** | 1.89 *** | 1.89 *** | 1.4 ***            | 1.6 ***  | 1.6 ***  | 0.4 *** | 0.7 *** | 0.7 *** |  |  |  |
| Race                          |          |          |          |                    |          |          |         |         |         |  |  |  |
| Black                         | 2.01 *** | 1.50 *** | 1.52 *** | 0.9                | 0.8 ***  | 0.8 ***  | 1.3 *** | 0.9     | 0.9     |  |  |  |
| Other                         | 2.12 *** | 1.61 *** | 1.59 *** | 1.1                | 0.9      | 0.9      | 1.5 *** | 0.9     | 0.8     |  |  |  |
| Hispanic                      | 2.18 *** | 1.65 *** | 1.64 *** | 0.9 **             | 0.8 ***  | 0.8 ***  | 1.4 *** | 1.2 *   | 1.2 **  |  |  |  |
| UR*Disability                 | N/A      | N/A      | 1.0      | N/A                | N/A      | 1.0      | N/A     | N/A     | 0.9     |  |  |  |
| UR*Black                      | N/A      | N/A      | 0.9      | N/A                | N/A      | 1.0      | N/A     | N/A     | 0.9     |  |  |  |
| UR*Other                      | N/A      | N/A      | 1.1      | N/A                | N/A      | 0.9      | N/A     | N/A     | 0.9     |  |  |  |
| UR*Hispanic                   | N/A      | N/A      | 1.0      | N/A                | N/A      | 1.1      | N/A     | N/A     | 0.8 **  |  |  |  |
| Individual covariates         |          | Yes      | Yes      |                    | Yes      | Yes      |         | Yes     | Yes     |  |  |  |
| Interaction terms             |          |          | Yes      |                    |          | Yes      |         |         | Yes     |  |  |  |
| N                             | 8,503    | 8,486    | 8,486    | 8,505              | 8,487    | 8,487    | 8,533   | 8,507   | 8,507   |  |  |  |
| Number of counties            | 781      | 778      | 778      | 779                | 776      | 776      | 781     | 777     | 777     |  |  |  |
| AIC                           | 10,082.4 | 9,720.6  | 9,725.0  | 10,442.8           | 10,068.2 | 10,075.8 | 9,766.5 | 8,351.3 | 8,351.7 |  |  |  |
| BIC                           | 10,131.7 | 9,889.7  | 9,922.3  | 10,492.2           | 10,230.3 | 10,273.1 | 9,815.9 | 8,513.4 | 8,542.0 |  |  |  |

Notes: \* Indicates  $p < 0.10$ , \*\* indicates  $p < 0.05$ , and \*\*\* indicates  $p < 0.01$ . N/A = not applicable.



**Table S.7. Association between residents in county receiving government assistance and self-reported health, work, and financial experiences during the COVID-19 pandemic**

| Residents receiving government assistance (GA), percentage |          |          |          |                    |          |          |         |         |         |  |  |
|------------------------------------------------------------|----------|----------|----------|--------------------|----------|----------|---------|---------|---------|--|--|
|                                                            | Finance  |          |          | Health care delays |          |          | Work    |         |         |  |  |
|                                                            | Model 0  | Model 1  | Model 2  | Model 0            | Model 1  | Model 2  | Model 0 | Model 1 | Model 2 |  |  |
| GA                                                         | 1.04     | 1.03     | 1.07     | 1.0                | 1.0      | 1.0      | 0.9 **  | 0.9 **  | 1.0     |  |  |
| Disability                                                 | 1.94 *** | 1.88 *** | 1.89 *** | 1.4 ***            | 1.6 ***  | 1.6 ***  | 0.4 *** | 0.7 *** | 0.7 *** |  |  |
| Race                                                       |          |          |          |                    |          |          |         |         |         |  |  |
| Black                                                      | 2.02 *** | 1.49 *** | 1.50 *** | 0.9                | 0.8 ***  | 0.8 ***  | 1.3 *** | 0.9     | 0.9     |  |  |
| Other                                                      | 2.13 *** | 1.60 *** | 1.61 *** | 1.1                | 0.9      | 0.9      | 1.5 *** | 0.9     | 0.9     |  |  |
| Hispanic                                                   | 2.17 *** | 1.64 *** | 1.63 *** | 0.9 **             | 0.8 ***  | 0.8 ***  | 1.4 *** | 1.2 *   | 1.2 **  |  |  |
| GA*Disability                                              | N/A      | N/A      | 0.9      | N/A                | N/A      | 1.0      | N/A     | N/A     | 0.9     |  |  |
| GA*Black                                                   | N/A      | N/A      | 1.0      | N/A                | N/A      | 1.0      | N/A     | N/A     | 1.0     |  |  |
| GA*Other                                                   | N/A      | N/A      | 1.0      | N/A                | N/A      | 1.1      | N/A     | N/A     | 1.1     |  |  |
| GA*Hispanic                                                | N/A      | N/A      | 1.0      | N/A                | N/A      | 1.1      | N/A     | N/A     | 1.0     |  |  |
| Individual covariates                                      |          | Yes      | Yes      |                    | Yes      | Yes      |         | Yes     | Yes     |  |  |
| Interaction terms                                          |          |          | Yes      |                    |          | Yes      |         |         | Yes     |  |  |
| N                                                          | 8,503    | 8,486    | 8,486    | 8,505              | 8,487    | 8,487    | 8,533   | 8,507   | 8,507   |  |  |
| Number of counties                                         | 781      | 778      | 778      | 779                | 776      | 776      | 781     | 777     | 777     |  |  |
| AIC                                                        | 10,082.9 | 9,719.8  | 9,725.6  | 10,442.3           | 10,068.5 | 10,075.5 | 9,760.2 | 8,349.3 | 8,355.3 |  |  |
| BIC                                                        | 10,132.3 | 9,888.9  | 9,922.92 | 10,491.7           | 10,230.6 | 10,272.8 | 9,809.6 | 8,511.4 | 8,545.6 |  |  |

Notes: \* Indicates  $p < 0.10$ , \*\* indicates  $p < 0.05$ , and \*\*\* indicates  $p < 0.01$ . N/A = not applicable.

**Table S.8. Pair-wise correlation matrix for area-level measures, Pearson’s correlation**

|                                           | Pandemic Vulnerability Index | Cases per 100,000 | Social Vulnerability Index | Residential racial segregation | Years of potential life lost | Available hospital beds | Unemployment rate | Residents receiving government assistance |
|-------------------------------------------|------------------------------|-------------------|----------------------------|--------------------------------|------------------------------|-------------------------|-------------------|-------------------------------------------|
| Pandemic Vulnerability Index              | 1.00                         |                   |                            |                                |                              |                         |                   |                                           |
| Cases per 100,000                         | 0.0683                       | 1.00              |                            |                                |                              |                         |                   |                                           |
| Social Vulnerability Index                | 0.7467                       | 0.0846            | 1.00                       |                                |                              |                         |                   |                                           |
| Residential racial segregation            | 0.1906                       | 0.0715            | 0.0496                     | 1.00                           |                              |                         |                   |                                           |
| Years of life lost                        | 0.4251                       | 0.1803            | 0.6025                     | 0.0482                         | 1.00                         |                         |                   |                                           |
| Available hospital beds                   | 0.3277                       | -0.0395           | 0.0324                     | 0.1409                         | -0.1895                      | 1.00                    |                   |                                           |
| Unemployment rate                         | 0.4337                       | -0.0313           | 0.5825                     | 0.0992                         | 0.5369                       | 0.0121                  | 1.00              |                                           |
| Residents receiving government assistance | 0.5069                       | 0.0569            | 0.7343                     | 0.0672                         | 0.6552                       | -0.0603                 | 0.7326            | 1.00                                      |

|            |  |  |  |  |  |  |  |  |
|------------|--|--|--|--|--|--|--|--|
| assistance |  |  |  |  |  |  |  |  |
|------------|--|--|--|--|--|--|--|--|

**Table S.9. Self-reported health, work, and financial experiences during the COVID-19 pandemic by alternative disabling conditions**

|                                                                                 | All older adults | Work-limiting condition | No work-limiting condition | <i>p</i> -value <sup>a</sup> | SSI/DI receipt | No SSI/DI receipt | <i>p</i> -value <sup>a</sup> |
|---------------------------------------------------------------------------------|------------------|-------------------------|----------------------------|------------------------------|----------------|-------------------|------------------------------|
| Unweighted number                                                               | 8,828            | 3,358                   | 5,083                      |                              | 1,149          | 7,679             |                              |
| <b>Health outcomes (%)</b>                                                      |                  |                         |                            |                              |                |                   |                              |
| <b>Ever received a COVID diagnosis</b>                                          |                  |                         |                            | ###                          |                |                   | ###                          |
| Yes                                                                             | 3.5              | 3.6                     | 3.5                        |                              | 2.0            | 3.7               |                              |
| Probably yes                                                                    | 0.6              | 0.7                     | 0.6                        |                              | 0.4            | 0.6               |                              |
| Probably no                                                                     | 0.7              | 0.9                     | 0.5                        |                              | 0.9            | 0.7               |                              |
| No                                                                              | 95.3             | 94.8                    | 95.5                       |                              | 96.8           | 94.5              |                              |
| <b>Ever tested</b>                                                              | 32.3             | 33.8                    | 32.0                       |                              | 32.7           | 32.2              |                              |
| If tested, any positive results                                                 | 9.9              | 9.3                     | 10.5                       |                              | 5.5            | 10.8              | ***                          |
| If positive diagnosis, hospitalization                                          | 15.5             | 23.2                    | 10.9                       | ***                          | 12.4           | 15.9              |                              |
| <b>Delayed any type of health care</b>                                          | 30.7             | 37.3                    | 27.1                       | ***                          | 32.6           | 30.4              |                              |
| Delayed surgery                                                                 | 13.1             | 15.8                    | 10.3                       | ***                          | 15.2           | 12.6              |                              |
| Delayed doctor visit                                                            | 57.2             | 58.0                    | 56.8                       |                              | 52.2           | 58.1              | **                           |
| Delayed filling a prescription                                                  | 7.3              | 7.9                     | 6.3                        |                              | 8.3            | 7.0               |                              |
| Delayed dental care                                                             | 72.2             | 71.5                    | 73.4                       |                              | 73.0           | 72.1              |                              |
| Delayed other health care                                                       | 22.7             | 26.7                    | 18.9                       | ***                          | 24.4           | 22.3              |                              |
| <b>Reasons for delaying care</b>                                                |                  |                         |                            |                              |                |                   |                              |
| Could not afford it                                                             | 14.5             | 15.3                    | 13.6                       |                              | 17.0           | 13.8              | *                            |
| Could not get an appointment                                                    | 15.7             | 15.8                    | 15.9                       |                              | 15.2           | 15.8              |                              |
| The clinic/hospital/doctor's office canceled, closed, or suggested rescheduling | 51.8             | 50.5                    | 53.5                       |                              | 47.9           | 52.5              |                              |
| Decided it could wait                                                           | 33.3             | 33.6                    | 33.4                       |                              | 31.6           | 33.5              |                              |
| Was afraid to go                                                                | 23.9             | 25.2                    | 22.3                       |                              | 24.0           | 23.9              |                              |
| <b>Work outcomes (%)</b>                                                        |                  |                         |                            |                              |                |                   |                              |
| Work affected because of the pandemic                                           |                  |                         |                            | ###                          |                |                   | ###                          |
| Yes                                                                             | 28.7             | 20.3                    | 34.3                       |                              | 11.8           | 31.2              |                              |

|                                                             | All<br>older<br>adults | Work-<br>limiting<br>condition | No work-<br>limiting<br>condition | <i>p</i> -value <sup>a</sup> | SSI/DI<br>receipt | No<br>SSI/DI<br>receipt | <i>p</i> -value <sup>a</sup> |
|-------------------------------------------------------------|------------------------|--------------------------------|-----------------------------------|------------------------------|-------------------|-------------------------|------------------------------|
| No                                                          | 45.6                   | 45.9                           | 45.8                              |                              | 51.3              | 44.7                    |                              |
| Not working when pandemic started                           | 25.7                   | 31.6                           | 19.1                              |                              | 38.5              | 23.7                    |                              |
| Work affected because of the pandemic (among those working) | 38.6                   | 31.0                           | 42.7                              | ***                          | 20.3              | 40.8                    | ***                          |
| Stopped work entirely                                       | 43.6                   | 57.0                           | 40.0                              | ***                          | 73.6              | 42.2                    | ***                          |
| Reason for work ending                                      |                        |                                |                                   | ##                           |                   |                         |                              |
| Lost job/laid off permanently                               | 14.0                   | 20.7                           | 11.9                              |                              | 18.9              | 13.7                    |                              |
| Furloughed/laid off temporarily                             | 48.8                   | 39.0                           | 53.0                              |                              | 31.9              | 50.4                    |                              |
| Quit                                                        | 6.1                    | 9.9                            | 4.4                               |                              | 8.6               | 5.9                     |                              |
| Changed work days or hours                                  | 27.8                   | 27.3                           | 27.9                              |                              | 24.8              | 27.8                    |                              |
| Work became more risky or dangerous                         | 20.8                   | 24.9                           | 20.2                              |                              | 17.2              | 20.8                    |                              |
| Work became harder                                          | 21.4                   | 26.7                           | 20.5                              | *                            | 14.7              | 21.5                    |                              |
| Switched to working remotely                                | 46.5                   | 41.3                           | 47.4                              |                              | 34.7              | 46.7                    |                              |
| Other changes                                               | 34.2                   | 36.3                           | 34.0                              |                              | 40.4              | 34.1                    |                              |
| Income changed because of the pandemic                      |                        |                                |                                   | ###                          |                   |                         | ###                          |
| Income went up                                              | 5.1                    | 3.5                            | 6.3                               |                              | 3.7               | 5.4                     |                              |
| Income went down                                            | 17.8                   | 17.5                           | 18.4                              |                              | 12.0              | 18.7                    |                              |
| About the same                                              | 77.1                   | 79.1                           | 75.3                              |                              | 84.3              | 75.9                    |                              |
| <b>Financial outcomes (%)</b>                               |                        |                                |                                   |                              |                   |                         |                              |
| Missed rent or mortgage payments                            | 5.5                    | 7.5                            | 4.5                               | ***                          | 5.6               | 5.4                     |                              |
| Missed credit card or other debt payments                   | 6.7                    | 9.4                            | 5.2                               | ***                          | 7.7               | 6.5                     |                              |
| Missed other payments (such as utilities or insurance)      | 7.1                    | 9.2                            | 5.8                               | ***                          | 9.0               | 6.6                     | ***                          |
| Could not pay medical bills                                 | 6.2                    | 8.2                            | 4.8                               | ***                          | 7.6               | 5.8                     | **                           |
| Didn't have enough money to buy food                        | 8.9                    | 11.4                           | 7.2                               | ***                          | 12.0              | 8.2                     | ***                          |
| Had trouble buying food even though had money               | 16.0                   | 19.7                           | 13.4                              | ***                          | 21.3              | 15.0                    | ***                          |
| No hardship                                                 | 68.6                   | 61.3                           | 73.1                              | ***                          | 61.6              | 69.8                    | ***                          |
| Other material hardship                                     | 6.9                    | 9.3                            | 5.5                               | ***                          | 7.2               | 6.8                     |                              |
| Received stimulus payment in late 2020/early 2021           | 80.3                   | 82.6                           | 79.6                              | ***                          | 83.6              | 79.8                    | **                           |
| <b>Retirement preparedness<sup>b</sup></b>                  |                        |                                |                                   |                              |                   |                         |                              |
| Probability of working full-time after age 65 in 2020       | 43.4                   | 36.8                           | 44.2                              | ***                          | 23.9              | 43.7                    | ***                          |

|                                                       | All<br>older<br>adults | Work-<br>limiting<br>condition | No work-<br>limiting<br>condition | <i>p</i> -value <sup>a</sup> | SSI/DI<br>receipt | No<br>SSI/DI<br>receipt | <i>p</i> -value <sup>a</sup> |
|-------------------------------------------------------|------------------------|--------------------------------|-----------------------------------|------------------------------|-------------------|-------------------------|------------------------------|
| Probability of working full-time after age 65 in 2018 | 45.0                   | 41.8                           | 45.4                              |                              | 20.0              | 45.4                    | ***                          |
| Expected retirement age in 2020 (mean)                | 69.0                   | 68.7                           | 69.0                              |                              | 68.8              | 69.0                    |                              |
| Expected retirement age in 2018 (mean)                | 68.8                   | 68.6                           | 68.8                              |                              | 68.2              | 68.8                    |                              |
| Frequency of thoughts about retirement in 2020 (%)    |                        |                                |                                   | ###                          |                   |                         | ###                          |
| Hardly at all                                         | 27.8                   | 23.2                           | 28.4                              |                              | 33.0              | 27.7                    |                              |
| A little                                              | 18.0                   | 17.4                           | 18.0                              |                              | 18.5              | 18.0                    |                              |
| Some                                                  | 25.7                   | 30.8                           | 25.1                              |                              | 27.6              | 25.7                    |                              |
| A lot                                                 | 28.6                   | 28.8                           | 28.5                              |                              | 21.4              | 28.7                    |                              |

<sup>a</sup>T-test significance is shown in each applicable row using \*. For categorical variables, Chi-square significance is shown in the variable heading row. Chi-square significance is shown using #. \* Indicates  $p < 0.10$ , \*\* indicates  $p < 0.05$ , and \*\*\* indicates  $p < 0.01$ . Blank columns indicate a *p*-value that is not significant at the  $p < 0.10$  level. We use an F-test for continuous variables rather than a Chi-square test.

<sup>b</sup>Among those working in 2018 and 2020.

DI = Disability Insurance; SSI = Supplemental Security Income.

**Table S.10. Self-reported health, work, and financial experiences during the COVID-19 pandemic by number of chronic conditions**

|                                                                                 | All older adults | 2+ chronic conditions | <2 chronic conditions | <i>p</i> -value <sup>a</sup> | 5+ chronic conditions | <5 chronic conditions | <i>p</i> -value <sup>a</sup> |
|---------------------------------------------------------------------------------|------------------|-----------------------|-----------------------|------------------------------|-----------------------|-----------------------|------------------------------|
| Unweighted number                                                               | 8,828            | 5,920                 | 2,908                 |                              |                       |                       |                              |
| <b>Health outcomes (%)</b>                                                      |                  |                       |                       |                              |                       |                       |                              |
| <b>Ever received a COVID diagnosis</b>                                          |                  |                       |                       | ###                          |                       |                       | ###                          |
| Yes                                                                             | 3.5              | 3.3                   | 3.7                   |                              | 4.8                   | 3.3                   |                              |
| Probably yes                                                                    | 0.6              | 0.6                   | 0.6                   |                              | 0.8                   | 0.6                   |                              |
| Probably no                                                                     | 0.7              | 0.7                   | 0.6                   |                              | 1.0                   | 0.6                   |                              |
| No                                                                              | 95.3             | 95.4                  | 95.1                  |                              | 93.4                  | 95.4                  |                              |
| <b>Ever tested</b>                                                              | 32.3             | 34.0                  | 28.8                  | ***                          | 38.8                  | 31.6                  | ***                          |
| If tested, any positive results                                                 | 9.9              | 9.5                   | 10.5                  |                              | 12.6                  | 9.5                   |                              |
| If positive diagnosis, hospitalization                                          | 15.5             | 17.0                  | 13.2                  |                              | 33.2                  | 13.5                  | ***                          |
| <b>Delayed any type of health care</b>                                          | 30.7             | 33.3                  | 25.9                  | ***                          | 39.8                  | 29.8                  | ***                          |
| Delayed surgery                                                                 | 13.1             | 14.4                  | 10.0                  | ***                          | 18.2                  | 12.4                  | ***                          |
| Delayed doctor visit                                                            | 57.2             | 58.7                  | 53.8                  | **                           | 63.4                  | 56.4                  | **                           |
| Delayed filling a prescription                                                  | 7.3              | 8.6                   | 4.4                   | ***                          | 8.3                   | 7.1                   |                              |
| Delayed dental care                                                             | 72.2             | 70.6                  | 76.0                  | ***                          | 61.3                  | 73.6                  | ***                          |
| Delayed other health care                                                       | 22.7             | 23.9                  | 19.9                  | **                           | 28.8                  | 21.9                  | ***                          |
| <b>Reasons for delaying care</b>                                                |                  |                       |                       |                              |                       |                       |                              |
| Could not afford it                                                             | 14.5             | 15.8                  | 11.6                  | ***                          | 19.1                  | 13.9                  | **                           |
| Could not get an appointment                                                    | 15.7             | 15.9                  | 15.2                  |                              | 15.3                  | 15.7                  |                              |
| The clinic/hospital/doctor's office canceled, closed, or suggested rescheduling | 51.8             | 51.7                  | 52.0                  |                              | 50.9                  | 51.9                  |                              |
| Decided it could wait                                                           | 33.3             | 31.9                  | 36.3                  | **                           | 32.9                  | 33.3                  |                              |
| Was afraid to go                                                                | 23.9             | 24.8                  | 21.9                  |                              | 27.3                  | 23.5                  |                              |
| <b>Work outcomes (%)</b>                                                        |                  |                       |                       |                              |                       |                       |                              |
| <b>Work affected because of the pandemic</b>                                    |                  |                       |                       | ###                          |                       |                       | ###                          |
| Yes                                                                             | 28.7             | 25.5                  | 33.8                  |                              | 15.7                  | 29.6                  |                              |
| No                                                                              | 45.6             | 46.3                  | 44.1                  |                              | 49.2                  | 45.2                  |                              |

|                                                                    | All older adults | 2+ chronic conditions | <2 chronic conditions | <i>p</i> -value <sup>a</sup> | 5+ chronic conditions | <5 chronic conditions | <i>p</i> -value <sup>a</sup> |
|--------------------------------------------------------------------|------------------|-----------------------|-----------------------|------------------------------|-----------------------|-----------------------|------------------------------|
| Not working when pandemic started                                  | 25.7             | 28.3                  | 19.6                  |                              | 32.1                  | 25.0                  |                              |
| <b>Work affected because of the pandemic (among those working)</b> | 38.6             | 35.8                  | 42.8                  | ***                          | 24.6                  | 39.5                  | ***                          |
| Stopped work entirely                                              | 43.6             | 45.6                  | 41.5                  | **                           | 46.9                  | 43.5                  |                              |
| <b>Reason for work ending</b>                                      |                  |                       |                       |                              |                       |                       |                              |
| Lost job/laid off permanently                                      | 14.0             | 12.8                  | 15.3                  |                              | 12.2                  | 14.0                  |                              |
| Furloughed/laid off temporarily                                    | 48.8             | 50.7                  | 46.7                  |                              | 58.5                  | 48.5                  |                              |
| Quit                                                               | 6.1              | 6.3                   | 5.8                   |                              | 9.1                   | 6.0                   |                              |
| Changed work days or hours                                         | 27.8             | 29.2                  | 26.4                  |                              | 31.8                  | 27.6                  |                              |
| Work became more risky or dangerous                                | 20.8             | 23.0                  | 18.7                  | *                            | 27.9                  | 20.6                  |                              |
| Work became harder                                                 | 21.4             | 23.3                  | 19.6                  |                              | 33.3                  | 21.0                  | *                            |
| Switched to working remotely                                       | 46.5             | 45.5                  | 47.2                  |                              | 42.9                  | 46.5                  |                              |
| Other changes                                                      | 34.2             | 33.1                  | 35.6                  |                              | 34.6                  | 34.4                  |                              |
| <b>Financial outcomes (%)</b>                                      |                  |                       |                       |                              |                       |                       |                              |
| Missed rent or mortgage payments                                   | 5.5              | 6.0                   | 4.8                   | **                           | 8.8                   | 5.2                   | ***                          |
| Missed credit card or other debt payments                          | 6.7              | 7.8                   | 5.0                   | ***                          | 10.8                  | 6.4                   | ***                          |
| Missed other payments (such as utilities or insurance)             | 7.1              | 8.1                   | 5.4                   | ***                          | 10.9                  | 6.7                   | ***                          |
| Could not pay medical bills                                        | 6.2              | 7.7                   | 3.7                   | ***                          | 10.9                  | 5.7                   | ***                          |
| Didn't have enough money to buy food                               | 8.9              | 9.8                   | 7.1                   | ***                          | 12.1                  | 8.5                   | ***                          |
| Had trouble buying food even though had money                      | 16.0             | 17.8                  | 12.5                  | ***                          | 23.1                  | 15.3                  | ***                          |
| No hardship                                                        | 68.6             | 65.2                  | 75.0                  | ***                          | 58.0                  | 69.7                  | ***                          |
| Other material hardship                                            | 6.9              | 7.7                   | 5.3                   | ***                          | 10.1                  | 6.6                   | ***                          |
| <b>Income changed because of the pandemic</b>                      |                  |                       |                       | ###                          |                       |                       | ###                          |
| Income went up                                                     | 5.1              | 5.2                   | 5.0                   |                              | 3.9                   | 5.2                   |                              |
| Income went down                                                   | 17.8             | 16.7                  | 19.4                  |                              | 15.2                  | 18.0                  |                              |
| About the same                                                     | 77.1             | 78.1                  | 75.5                  |                              | 80.9                  | 76.8                  |                              |
| Received stimulus payment in late 2020/early 2021                  | 80.3             | 81.4                  | 78.1                  | ***                          | 81.6                  | 80.2                  | 40.1                         |
| <b>Retirement preparedness<sup>b</sup></b>                         |                  |                       |                       |                              |                       |                       |                              |



|                                                           | All older adults | 2+ chronic conditions | <2 chronic conditions | <i>p</i> -value <sup>a</sup> | 5+ chronic conditions | <5 chronic conditions | <i>p</i> -value <sup>a</sup> |
|-----------------------------------------------------------|------------------|-----------------------|-----------------------|------------------------------|-----------------------|-----------------------|------------------------------|
| Probability of working full-time after age 65 in 2020     | 43.4             | 42.0                  | 44.3                  |                              | 27.7                  | 43.6                  | ***                          |
| Probability of working full-time after age 65 in 2018     | 45.0             | 43.1                  | 46.4                  | **                           | 33.9                  | 45.1                  | *                            |
| Expected retirement age in 2020                           | 69.0             | 68.7                  | 69.2                  | **                           | 69.3                  | 69.0                  |                              |
| Expected retirement age in 2018                           | 68.8             | 68.6                  | 69.0                  | *                            | 68.7                  | 68.8                  |                              |
| <b>Frequency of thoughts about retirement in 2020 (%)</b> |                  |                       |                       | ###                          |                       |                       | ###                          |
| Hardly at all                                             | 27.8             | 26.2                  | 29.3                  |                              | 34.6                  | 27.7                  |                              |
| A little                                                  | 18.0             | 16.9                  | 18.9                  |                              | 17.2                  | 18.0                  |                              |
| Some                                                      | 25.7             | 25.7                  | 25.7                  |                              | 15.6                  | 25.9                  |                              |
| A lot                                                     | 28.6             | 31.3                  | 26.1                  |                              | 32.0                  | 28.5                  |                              |

<sup>a</sup>T-test significance is shown in each applicable row using \*. For categorical variables, Chi-square significance is shown in the variable heading row. Chi-square significance is shown using #. \* Indicates  $p < 0.10$ , \*\* indicates  $p < 0.05$ , and \*\*\* indicates  $p < 0.01$ . Blank columns indicate a *p*-value that is not significant at the  $p < 0.10$  level. We use an F-test for continuous variables rather than a Chi-square test.

<sup>b</sup>Among those working in 2018 and 2020.
